# Supplementary material for: Development and evaluation of a mobile-optimized daily self-rating depression screening app: A preliminary study
Source: PLoS One. 2018 Jun 26;13(6):e0199118. doi: 10.1371/journal.pone.0199118 (PMC6019749; doi:10.1371/journal.pone.0199118)
Supplement: S1 File — (XLSX) [file pone.0199118.s001.xlsx]

## Sheet: Sheet1
ID	Sex	Age	OS	Online	M_algorithm_A	M_algorithm_B	Online_cutoff	M_algorithm_A_cutoff	M_algorithm_B_cutoff	Clinical_assessment	PHQ9
P1	2	19	2	2	2	0	1	1	1	1	0
P2	1	25	2	2	3	3	1	1	1	1	0
P3	2	23	2	6	5	3	1	1	1	1	5
P4	2	19	2	13	11	9	2	1	1	1	2
P5	2	22	2	16	13	9	2	2	1	1	7
P6	1	29	1	3	6	2	1	1	1	1	0
P7	1	23	2	3	6	4	1	1	1	1	1
P8	1	19	1	3	7	6	1	1	1	1	3
P9	2	21	2	1	1	0	1	1	1	1	1
P10	1	24	1	3	5	1	1	1	1	1	1
P11	1	25	1	0	0	0	1	1	1	1	3
P12	1	19	2	0	5	2	1	1	1	1	4
P13	1	25	2	2	3	3	1	1	1	1	0
P14	2	21	2	7	8	3	1	1	1	1	4
P15	1	20	1	2	1	0	1	1	1	1	3
P16	2	23	2	3	3	2	1	1	1	1	5
P17	2	22	1	17	16	13	2	2	2	1	2
P18	1	24	1	8	9	5	1	1	1	1	7
P19	2	19	2	12	10	8	1	1	1	1	2
P20	1	22	2	14	14	10	2	2	1	1	7
Sex: 1 (Male), 2 (Female) OS: 1 (Android), 2 (iOS) Online_cutoff / M_algorithm_A_cutoff / M_algorithm_B_cutoff: 1 (Non-depressed), 2 (Depressed)
